# Supplementary material for: Clinical Presentations, Echocardiographic Findings, and Complications of Rheumatic Heart Disease in Children Admitted to Gaafar Ibnauf Hospital, Khartoum, Sudan
Source: Research Square preprint supplement (doi:10.21203/rs.3.rs-6631711/v1), 2025-06-30
Supplement: Supplementary file 1 [file 3572964a2e75567541c69aef.pdf]

**Sociodemographic data:**

1- Age in years

2- Year of admission

2019

2020

3- Residence

4- Socioeconomic status

Low

Moderate

**Clinical presentation:**

1- Duration of symptoms

< 1 month

1-6 months

> 6 months

2- Symptoms at presentation

SOB

Fever

Palpitations

Cough

Joints pain

Lower limb edema

Recurrent tonsillitis

Sore throat

Chest pain

Chorea

3- SOB Classifications

NYHA class 1

NYHA class 2

NYHA class 3

NYHA class 4

4- Presence of murmur

Yes

No

5- Murmur types

pan systolic murmur

diastolic murmur

systolic murmur

pan systolic and diastolic

systolic and diastolic

6- Patients on anticoagulants

Yes

No

7- Patients on benzathine penicillin G

Yes

No

**Echocardiographic finding**

1- Number of Valvular Lesions

Single valve

Two valve

Three valve

Four-valve

## 2- Types of valvular lesions

Isolated MR

Combined MR and AR

Combined MR and TR

Combined MR,AR and AS

Combined MR, MS and AR

Combined MR ,MS ,AR and TR

Combined MR,AR, TR and PHTN

## 3- Severity of valvular lesions

MR ; Mild Moderate Severe

MS ; Mild Moderate Severe

AR ; Mild Moderate Severe

AS ; Mild Moderate Severe

TR ; Mild Moderate Severe

PR ; Mild Moderate Severe

## **Complications at presentation:**

1- Recurrent Rheumatic Fever

Yes

No

2- heart failure

Yes

No

3- pulmonary hypertension

Yes

No

## **Complications in the hospital**

1- Infective endocarditis

Yes

No

2- Arrhythmia

Yes

No

3- Cardiogenic shock

Yes

No

4- pericardial effusion

Yes

No

5- Chest infections

Yes

No

6- Referral for intervention

Yes

No

7- Death
